# Supplementary material for: Trajectories of Energy Intake Distribution and Risk of Dyslipidemia: Findings from the China Health and Nutrition Survey (1991–2018)
Source: MDPI journal article supplement (doi:10.3390/nu13103488), 2021-10-01
Supplement: s1 [file s1]

**Table S1.** Comparison of baseline characteristics between included and excluded participants<sup>1</sup>

| Baseline characteristics                              | Excluded(n=26876) | Included(n=2843)   | P value |
|-------------------------------------------------------|-------------------|--------------------|---------|
| Age (year, median [IQR])                              | 46.8(33.1,61.0)   | 53.6(44.8,61.8)    | <0.001  |
| Gender (%)                                            |                   |                    | 0.06    |
| Man                                                   | 47.1              | 45.2               |         |
| Woman                                                 | 52.9              | 54.8               |         |
| Marriage status (%)                                   |                   |                    | <0.001  |
| In marriage                                           | 74.9              | 90.9               |         |
| Other status                                          | 25.1              | 9.2                |         |
| Geographic region (%)                                 |                   |                    | <0.001  |
| Urban                                                 | 40.6              | 26.5               |         |
| Rural                                                 | 59.4              | 73.5               |         |
| Smoking (%)                                           |                   |                    | <0.001  |
| Nonsmoker                                             | 75.5              | 72.6               |         |
| Current smoker                                        | 24.5              | 27.4               |         |
| Drinking (%)                                          |                   |                    | 0.90    |
| nondrinker                                            | 67.3              | 67.2               |         |
| Current drinker                                       | 32.7              | 32.9               |         |
| Education level (%)                                   |                   |                    | <0.001  |
| Primary school                                        | 32.9              | 47.5               |         |
| Middle school                                         | 33.2              | 35.1               |         |
| High school and above                                 | 33.9              | 17.4               |         |
| Physical activity (%)                                 |                   |                    | <0.001  |
| Low                                                   | 94.8              | 89.5               |         |
| Medium                                                | 3.7               | 7.2                |         |
| High                                                  | 1.5               | 3.3                |         |
| Chronic disease history (%)                           |                   |                    | 0.06    |
| No                                                    | 86.8              | 88.0               |         |
| Yes                                                   | 13.2              | 12.0               |         |
| Per capita household income (yuan/year, median [IQR]) | 22169(7893,54168) | 22299(11488,41426) | 0.85    |
| Urbanicity score (median [IQR])                       | 69.6 (51.8,84.8)  | 59.5 (49.7,81.9)   | <0.001  |
| BMI (mg/kg <sup>2</sup> , mean [SD])                  | 23.4(3.7)         | 23.1 (3.3)         | <0.001  |
| WC (cm, mean [SD])                                    | 82.1(11.5)        | 81.6(9.9)          | 0.05    |
| SBP (mmHg, mean [SD])                                 | 123.9(19.4)       | 124.9(18.5)        | 0.01    |
| DBP (mmHg, mean [SD])                                 | 79.5(11.5)        | 80.5(11.3)         | <0.001  |
| TC (mmol/L, mean [SD])                                | 4.9(1.1)          | 4.6(0.7)           | <0.001  |
| TG (mmol/L, median [IQR])                             | 1.3(0.9,2.1)      | 1.1(0.8,1.4)       | <0.001  |
| HDL-C (mmol/L, mean [SD])                             | 1.3(0.4)          | 1.5(0.4)           | <0.001  |

|                           |          |          |        |
|---------------------------|----------|----------|--------|
| LDL-C (mmol/L, mean [SD]) | 3.1(1.0) | 2.9(0.6) | <0.001 |
|---------------------------|----------|----------|--------|

---

<sup>1</sup> Comparison of characteristics in the baseline of follow-up between 2009 and 2018. If participants did not visit from 2009 onward, then the year closest to 2009 was taken as baseline.
