# Supplementary material for: Trajectories of Energy Intake Distribution and Risk of Dyslipidemia: Findings from the China Health and Nutrition Survey (1991–2018)
Source: MDPI journal article supplement (doi:10.3390/nu13103488), 2021-10-01
Supplement: s1 [file s1]

**Table S2.** Parameters of model-adequacy criteria of the multi-trajectory model

| Trajectory group number | 2ΔBIC   | APPA | OCC                            | Entropy | Proportion of individuals in groups (%) |
|-------------------------|---------|------|--------------------------------|---------|-----------------------------------------|
| 1                       | NA      | NA   | NA                             | 1       | 100                                     |
| 2                       | 4014.96 | 0.93 | 9.77/19.21                     | 0.771   | 61.58/38.42                             |
| 3                       | 4456.44 | 0.94 | 11.60/19.92/4476.06            | 0.861   | 60.94/36.91/2.15                        |
| 4                       | 1577.94 | 0.93 | 11.37/21.96/75.24/5324.30      | 0.858   | 58.33/27.76/12.03/1.89                  |
| 5                       | 1018.96 | 0.91 | 12.37/20.84/85.83/6.40/7955.07 | 0.849   | 49.63/29.23//10.65/8.62/1.87            |

2ΔBIC,  $\approx$  the logged Bayes factor,  $> 10$  was considered as a reasonable standard for strong evidence in favor of the complex model ); APPA, average posterior probability of assignment,  $> 0.70$  was indicative of a good model fit; OCC, odds of correct classification,  $> 5$  for all groups was indicative of a good model fit; Entropy,  $> 0.80$  was indicative of better classification; Proportion of individuals in group,  $\geq 1\%$  for each group was accepted.
