# Supplementary material for: Trajectories of Energy Intake Distribution and Risk of Dyslipidemia: Findings from the China Health and Nutrition Survey (1991–2018)
Source: MDPI journal article supplement (doi:10.3390/nu13103488), 2021-10-01
Supplement: s1 [file s1]

**Table S3.** Association between trajectory groups and risk of dyslipidemia in Chinese adults without chronic diseases (n=2036) <sup>1</sup>

|                      | N    | Cumulative<br>number of<br>cases/person<br>-year | Model 1             | Model 2             | Model 3             | Model 4             |
|----------------------|------|--------------------------------------------------|---------------------|---------------------|---------------------|---------------------|
| Trajectory groups    |      |                                                  | Risk ratio (95% CI) |
| Dyslipidemia         |      |                                                  |                     |                     |                     |                     |
| Group 1              | 1146 | 383/12252                                        | 1                   | 1                   | 1                   | 1                   |
| Group 2              | 589  | 218/6213                                         | 1.11(0.95,1.31)     | 1.04(0.88,1.23)     | 1.05(0.89,1.24)     | 1.12(0.95,1.33)     |
| Group 3              | 260  | 107/2898                                         | 1.21(0.99,1.48)     | 1.24(1.01,1.53) *   | 1.25(1.01,1.53) *   | 1.44(1.17,1.78) **  |
| Group 4              | 41   | 15/405                                           | 1.15(0.69,1.93)     | 1.18(0.69,2.02)     | 1.17(0.69,1.99)     | 1.21(0.73,2.02)     |
| Hypercholesterolemia |      |                                                  |                     |                     |                     |                     |
| Group 1              | 1146 | 105/12252                                        | 1                   | 1                   | 1                   | 1                   |
| Group 2              | 589  | 53/6213                                          | 0.99(0.70,1.40)     | 1.00(0.70,1.44)     | 1.04(0.72,1.49)     | 1.10(0.76,1.58)     |
| Group 3              | 260  | 34/2898                                          | 1.42(0.95,2.13)     | 1.57(1.04,2.37) *   | 1.58(1.05,2.39) *   | 1.65(1.08,2.50) *   |
| Group 4              | 41   | 3/405                                            | 0.85(0.28,2.63)     | 0.84(0.27,2.65)     | 0.87(0.28,2.73)     | 0.90(0.28,2.83)     |
| Hypertriglyceridemia |      |                                                  |                     |                     |                     |                     |
| Group 1              | 1146 | 147/12252                                        | 1                   | 1                   | 1                   | 1                   |
| Group 2              | 589  | 88/6213                                          | 1.16(0.88,1.54)     | 1.05(0.79,1.41)     | 1.07(0.81,1.43)     | 1.19(0.89,1.61)     |
| Group 3              | 260  | 36/2898                                          | 1.06(0.74,1.52)     | 1.03(0.72,1.48)     | 1.03(0.72,1.48)     | 1.12(0.91,1.90)     |
| Group 4              | 41   | 10/405                                           | 2.01(1.07,3.75) *   | 2.23(1.17,4.23) *   | 2.20(1.17,4.15) *   | 2.36(1.24,4.50) **  |
| Low HDL_C            |      |                                                  |                     |                     |                     |                     |
| Group 1              | 1146 | 150/12252                                        | 1                   | 1                   | 1                   | 1                   |
| Group 2              | 589  | 96/6213                                          | 1.03(0.77,1.39)     | 1.06(0.81,1.38)     | 1.07(0.82,1.39)     | 0.98(0.66,1.47)     |
| Group 3              | 260  | 31/2898                                          | 1.82(1.33,2.49)     | 0.85(0.57,1.26)     | 0.84(0.57,1.25)     | 1.13(0.86,1.47)     |
| Group 4              | 41   | 5/405                                            | 0.65(0.22,1.94)     | 1.08(0.46,2.57)     | 1.04(0.43,2.46)     | 1.05(0.45,2.45)     |
| High LDL_C           |      |                                                  |                     |                     |                     |                     |
| Group 1              | 1146 | 136/12252                                        | 1                   | 1                   | 1                   | 1                   |
| Group 2              | 589  | 72/6213                                          | 1.25(0.96,1.62)     | 1.02(0.75,1.39)     | 1.06(0.78,1.44)     | 1.13(0.83,1.54)     |
| Group 3              | 260  | 57/2898                                          | 0.89(0.60,1.33)     | 2.05(1.49,2.84) *** | 2.08(1.50,2.87) *** | 2.32(1.67,3.23) *** |
| Group 4              | 41   | 3/405                                            | 0.98(0.42,2.30)     | 0.62(0.21,1.87)     | 0.66(0.22,1.97)     | 0.67(0.23,1.95)     |

<sup>1</sup> A three-level mixed-effects Poisson regression with robust (sandwich) estimation of variance, taking household as the third level, individual as the second level, and repeated measurements of individual as the first level. Model 1 adjusted for no covariates. Model 2 adjusted for age, gender (categorical), marriage status(categorical), an education level (categorical), geographic region (categorical), per capita household income, urbanicity index, physical activity (categorical), smoking (categorical), alcohol drinking (categorical), sleep duration (categorical), and chronic disease history (categorical). Model 3 additionally adjusted for total energy intake and CDGI (2019)-A score. Model 4 additionally adjusted for BMI, WC, SBP, and DBP. \* P < 0.05, \*\* P < 0.01, \*\*\*P < 0.001.
