# Supplementary material for: Trajectories of Energy Intake Distribution and Risk of Dyslipidemia: Findings from the China Health and Nutrition Survey (1991–2018)
Source: MDPI journal article supplement (doi:10.3390/nu13103488), 2021-10-01
Supplement: s1 [file s1]

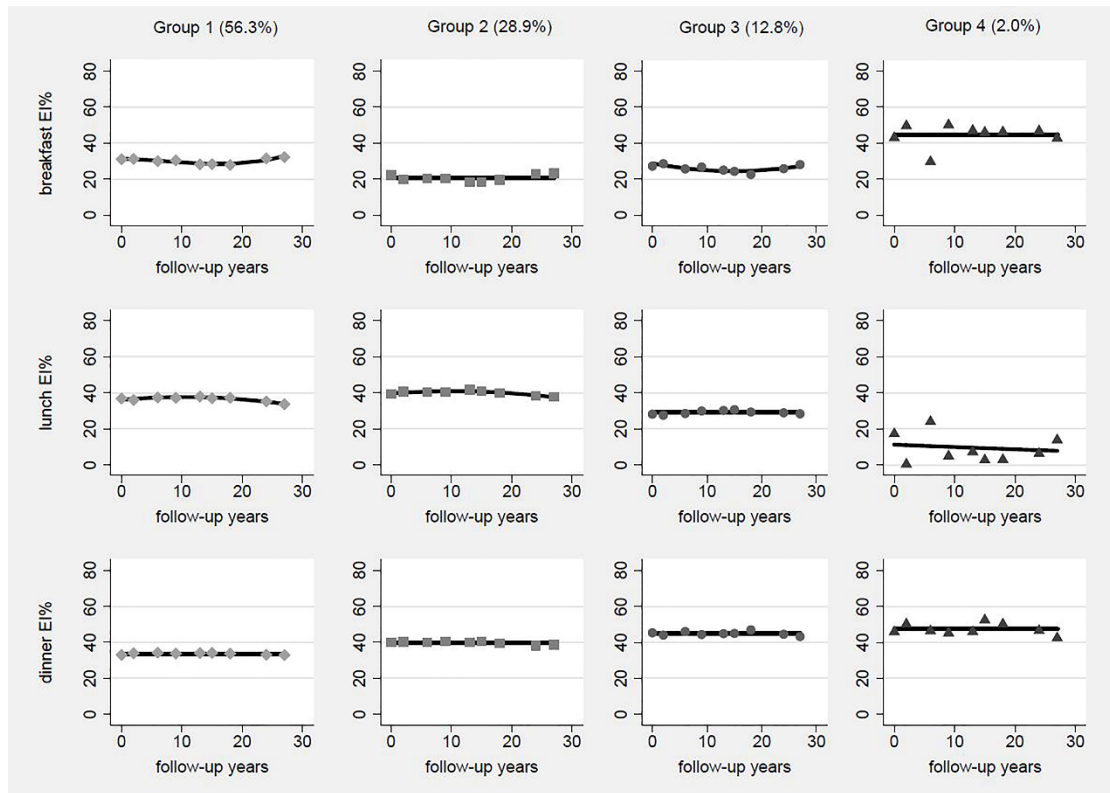

**Figure S2.** Estimated trajectory groups of energy intake distribution among Chinese adults without chronic diseases (n=2036)
