# Supplementary figures and images for: Trajectories of Energy Intake Distribution and Risk of Dyslipidemia: Findings from the China Health and Nutrition Survey (1991–2018)
Source: MDPI journal article supplement (doi:10.3390/nu13103488), 2021-10-01

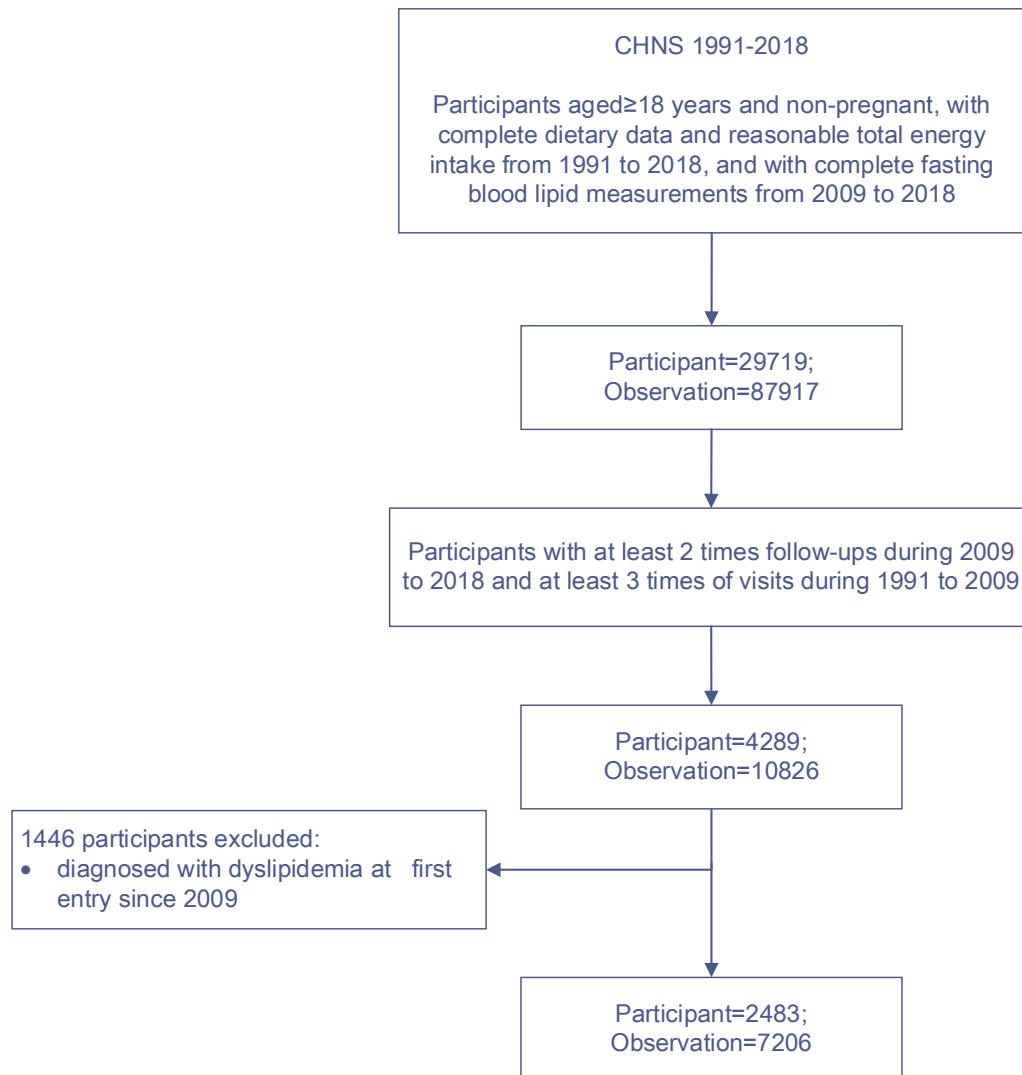

**Figure S1.** Flow chart of study population selection

Supplement: s1 [file s1]
